# Supplementary material for: Agnostic Evaluation of Ipilimumab and Nivolumab Association: a Metanalysis.
Source: Research Square preprint supplement (doi:10.21203/rs.3.rs-55297/v2), 2020-10-27
Supplement: Supplementary file 1 [file ee3a41e7885313f24347f14a.pdf]

Figure S1. G3/G4 toxicity analysis for NIVO1+IPI3 schedule

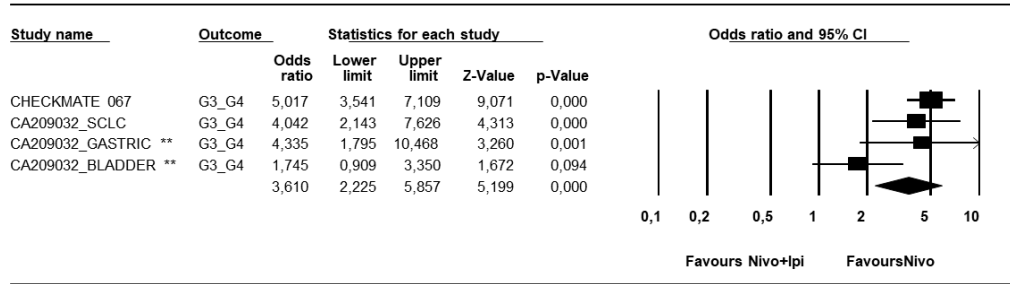

Figure S1 shows G3/G4 toxicity analysis for NIVO1+IPI3 schedule. Nivolumab had a large benefit compared to NIVO1+IPI3 combination. Random effect model –Significant heterogeneity ( $P=0.049$ ). NIVO1/IPI3: nivolumab 1 mg/kg and ipilimumab 3 mg/kg.

Figure S2. G3/G4 toxicity analysis for NIVO3+IPI1 schedule

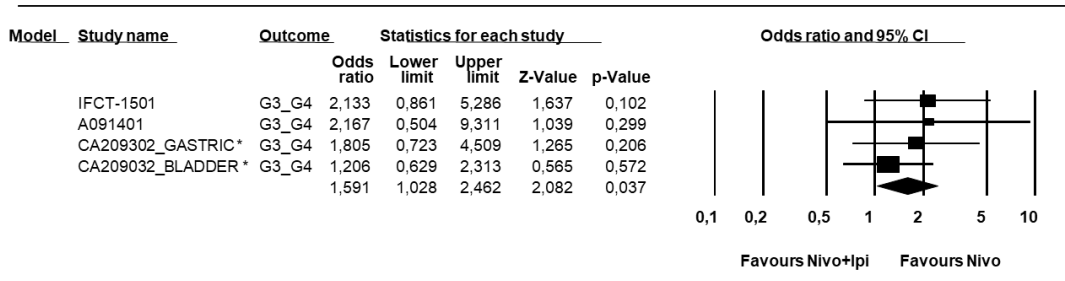

Figure S2 shows G3/G4 toxicity analysis for NIVO3+IPI1 schedule. Nivolumab resulted less toxic compared to NIVO3+IPI1 combination. Fixed effect model –Heterogeneity not significant ( $P=0.72$ ). NIVO3/IPI1: nivolumab 3 mg/kg and ipilimumab 1 mg/kg.
